# Supplementary material
Source: publisher site journal article supplement (https://www.dovepress.com/article/494489)
Supplement: Supplementary file 1 [file get_supplementary_file.php]

**Supplementary Table 1.** SARC-F Questionnaire for sarcopenia (Malmstrom and Morley, 2013)

| **Components** | **Questions** | **Scoring** |
| --- | --- | --- |
| Strength | How much difficulty do you have in lifting and carrying 5 Kgs? | None = 0 Some = 1 A lot or unable = 2 |
| Assistance in walking | How much difficulty do you have walking across a room? | None = 0 Some = 1  A lot, use aids, or unable = 2 |
| Raise from a chair | How much difficulty do you have transferring from a chair or bed? | None = 0  Some = 1  A lot or unable without help = 2 |
| Climb stairs | How much difficulty do you have climbing a flight of 10 stairs? | None = 0 Some = 1 A lot or unable = 2 |
| Falls | How many times have you fallen in the past year? | None = 0  1 – 3 times = 1  4 or more falls = 2 |

**Supplementary Figure 1.** Gait Speed Test Scheme

**
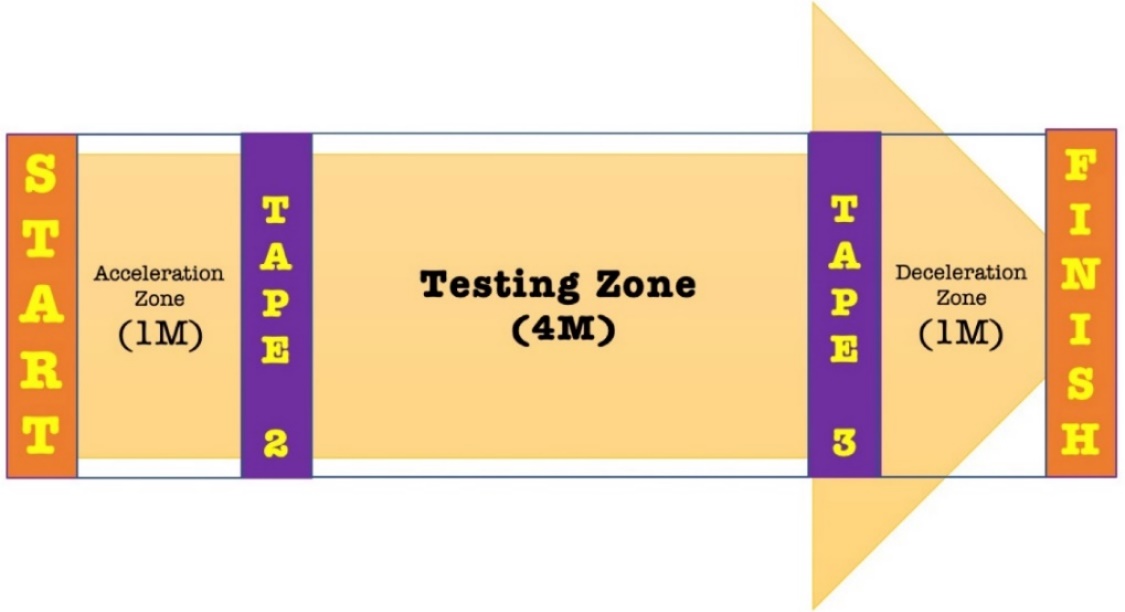
**
